# Supplementary material
Source: publisher figshare collection journal article supplement (https://acs.figshare.com/ndownloader/files/5140867)

Supporting Information

for

J. Med. Chem.

Manuscript Number: jm049429h

**Stereoselective Synthesis of a Couple of [L-Arg,  
L/D-3-(2-naphthyl)alanine]-Type (*E*)-Alkene Dipeptide  
Isosteres and its Application to Synthesis and Biological  
Evaluation of Pseudopeptide Analogs of a Small-Sized  
CXCR4 Antagonist FC131**

Hirokazu Tamamura,\* Kenichi Hiramatsu, Satoshi Ueda, Zixuan Wang,<sup>§</sup> Shuichi Kusano,<sup>†</sup> Shigemi Terakubo,<sup>†</sup> John O. Trent,<sup>¶</sup> Stephen C. Peiper,<sup>§</sup> Naoki Yamamoto,<sup>#</sup> Hideki Nakashima,<sup>†</sup> Akira Otaka, and Nobutaka Fujii\*

# HPLC chart of **37a**

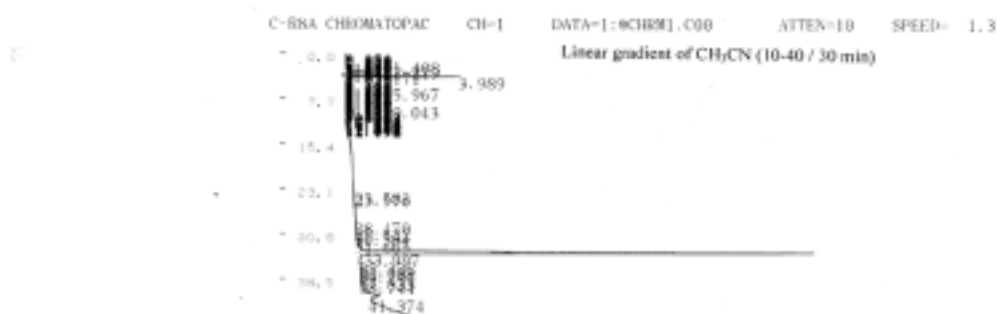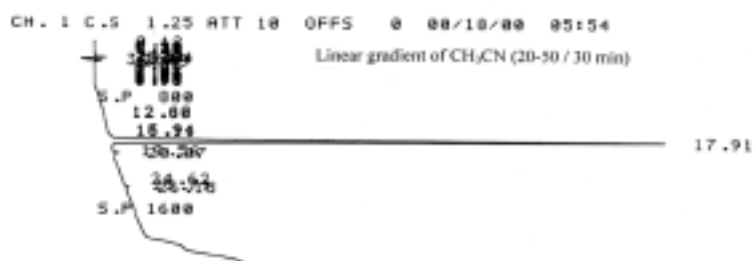

# HPLC chart of **37b**

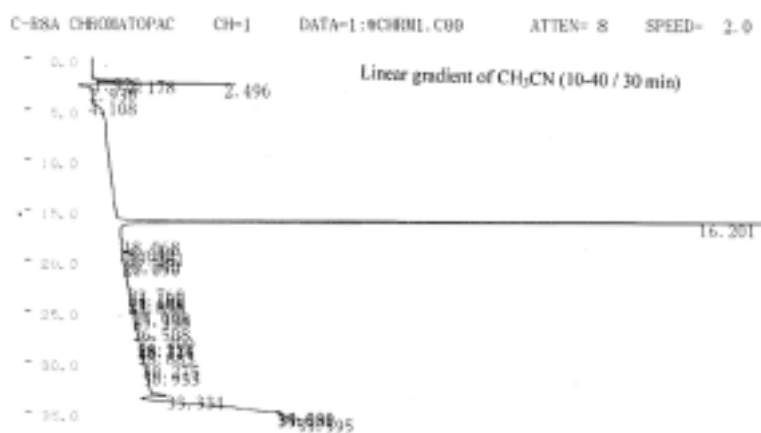

# HPLC chart of **37c**

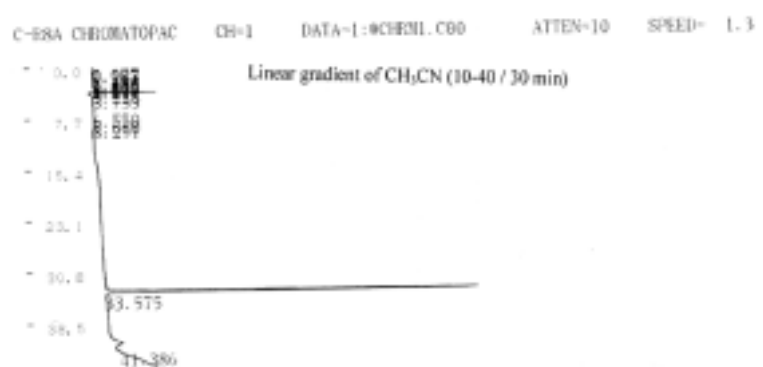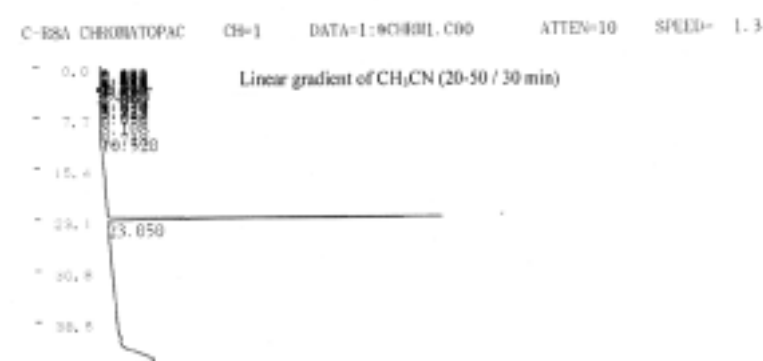

# HPLC chart of **37d**

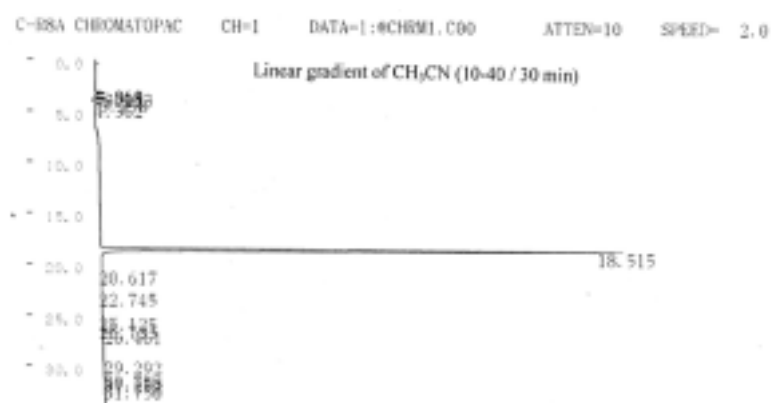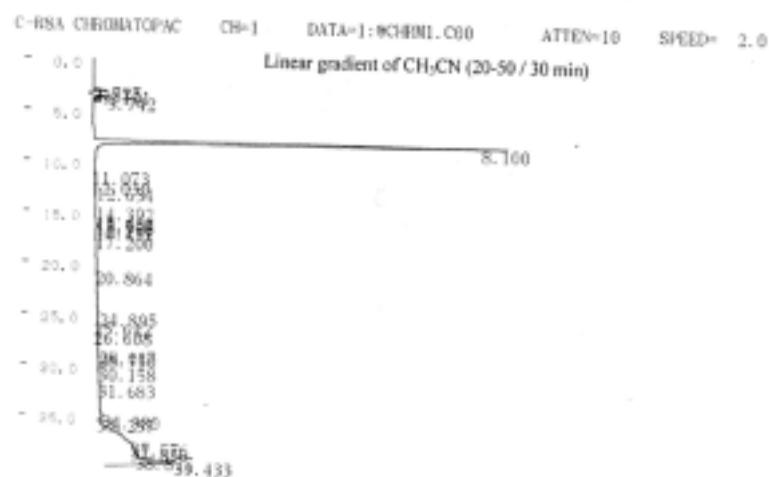

# HPLC chart of 37f

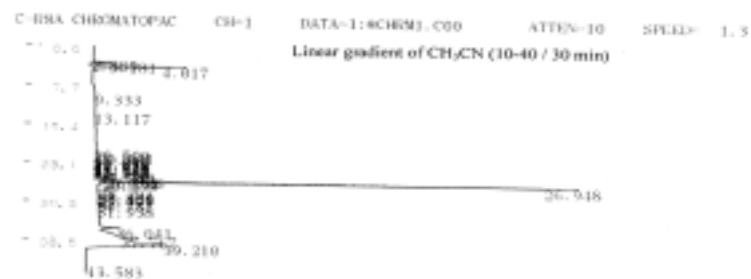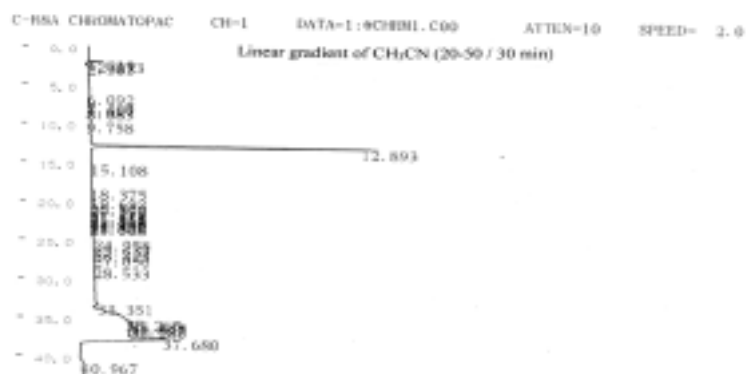

Supplement: Supplementary file 1 [file 5140867]
